# Supplementary material for: Metal-free C5N2 doped with a boron atom as an efficient electrocatalyst for the nitrogen reduction reaction
Source: Royal Society of Chemistry journal article supplement (doi:10.1039/d1nj04909g), 2021-12-23
Supplement: d1nj04909g1.pdf [file d1nj04909g1.pdf]

**Metal-free C<sub>5</sub>N<sub>2</sub> doped with boron atom as an efficient electrocatalyst for nitrogen reduction reaction**

Tingting Zhao,<sup>a</sup> Yu Tian,<sup>b</sup> Likai Yan<sup>\*a</sup> and Zhongmin Su<sup>a</sup>

<sup>a</sup> Institute of Functional Materials Chemistry, Key Laboratory of Polyoxometalate Science of Ministry of Education, Faculty of Chemistry, Northeast Normal University, Changchun, 130024, China

<sup>b</sup> Institute for Interdisciplinary Quantum Information Technology, Jilin Engineering Normal University, Changchun, 130052, China.

---

\*To whom correspondence should be addressed.  
E-mail: yanlk924@nenu.edu.cn (L. -K. Yan).

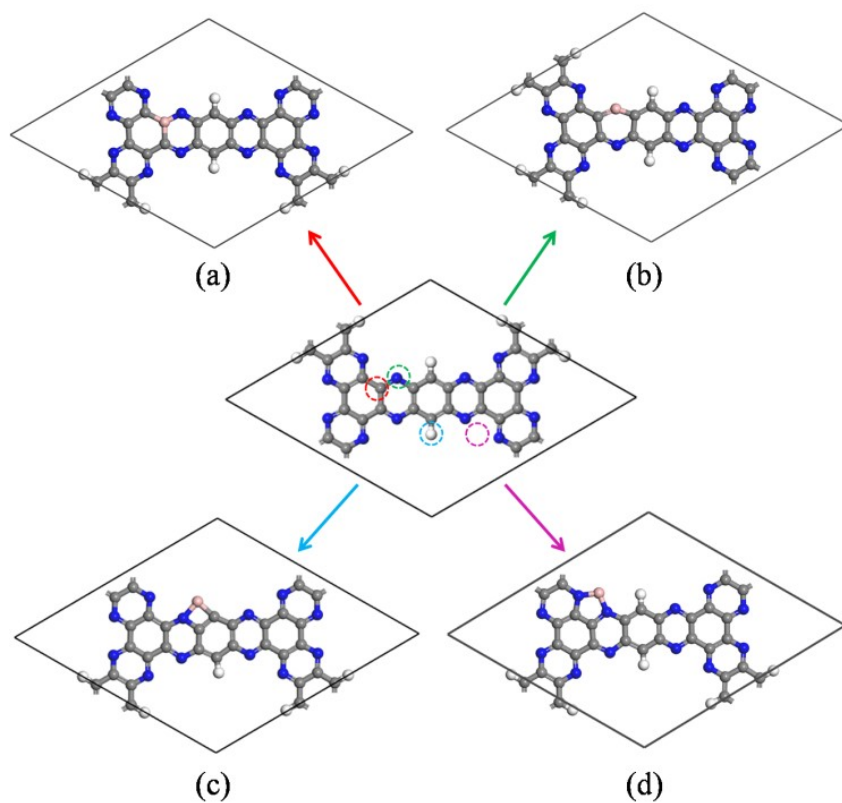

**Fig. S1** The optimized structures of (a) B<sub>C</sub>, (b) B<sub>N</sub>, (c) B<sub>H</sub>, and (d) B<sub>int</sub>-doped C<sub>5</sub>N<sub>2</sub>.

**Table S1** Computed free energy changes of  $*\text{NHNH}_2 \rightarrow *\text{NH}_2\text{NH}_2$  on  $\text{B}_{\text{int}}$ -doped  $\text{C}_5\text{N}_2$

using different supercell sizes.

| Reaction                                             | $1 \times 1$ | $2 \times 1$ |
|------------------------------------------------------|--------------|--------------|
| $*\text{NHNH}_2 \rightarrow *\text{NH}_2\text{NH}_2$ | 0.54         | 0.42         |

**Table S2** The computed cohesive energies ( $E_c$ , eV), formation energies ( $E_f$ , eV), and the shortest distance between B and its nearest N or C atom ( $d_{B-N/C}$ , Å).

|             | $B_C-C_5N_2$ | $B_N-C_5N_2$ | $B_H-C_5N_2$ | $B_{int}-C_5N_2$ |
|-------------|--------------|--------------|--------------|------------------|
| $E_c$       | -6.27        | -6.30        | -6.31        | -6.30            |
| $E_f$       | -0.20        | 0.98         | 3.37         | -0.23            |
| $d_{B-N/C}$ | 1.40         | 1.43         | 1.55         | 1.46             |

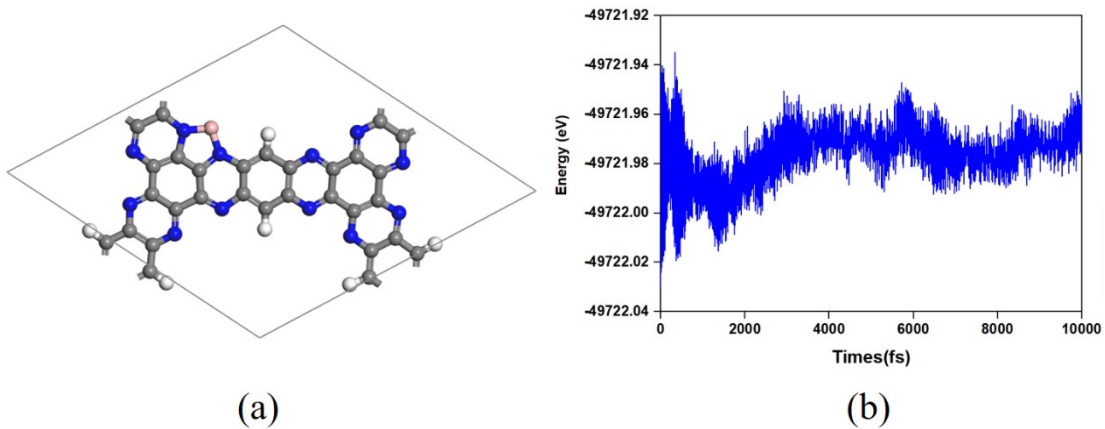

**Fig. S2** Geometry snapshot (a) and variations of energy (b) against time for MD simulations of B<sub>int</sub>-doped C<sub>5</sub>N<sub>2</sub>, and the simulation is run at 500 K for 10 ps with a time step of 1 fs.

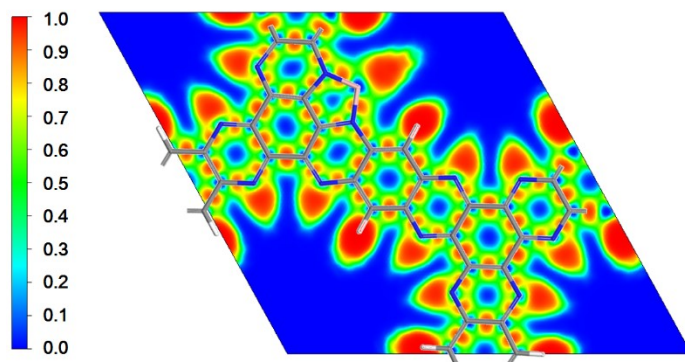

**Fig. S3** Electron localization function (ELF) map of the  $B_{\text{int}}$ -doped  $C_5N_2$ . The blue and pink spheres represent N and  $B_{\text{int}}$  atoms, respectively.

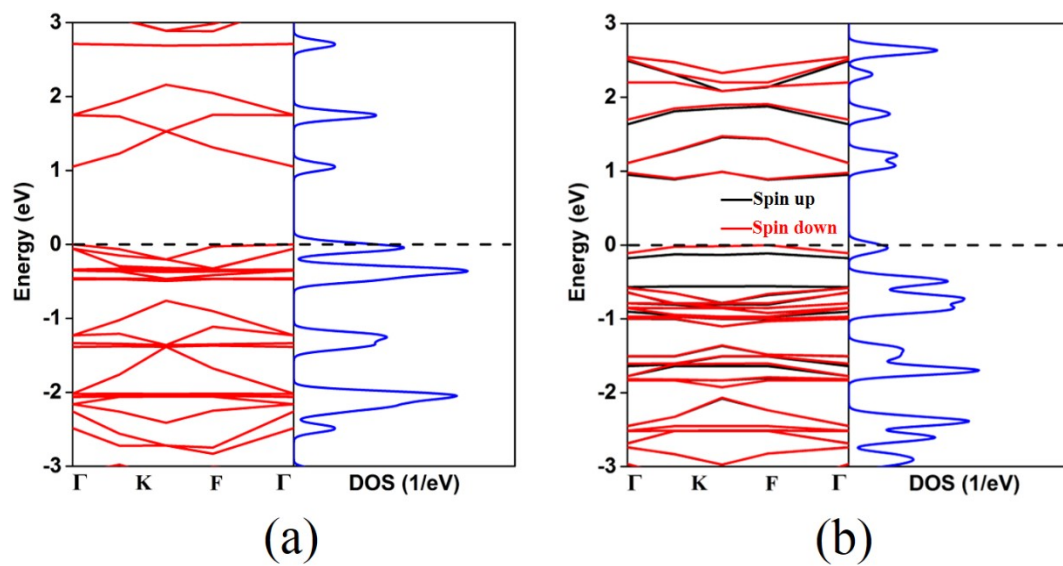

**Fig. S4** Band structures and DOS for (a)  $C_5N_2$ , and (b)  $B_{int}$ -doped  $C_5N_2$ . The black and red lines in Fig. S4b represent the band structure of the spin up and spin down states, respectively.

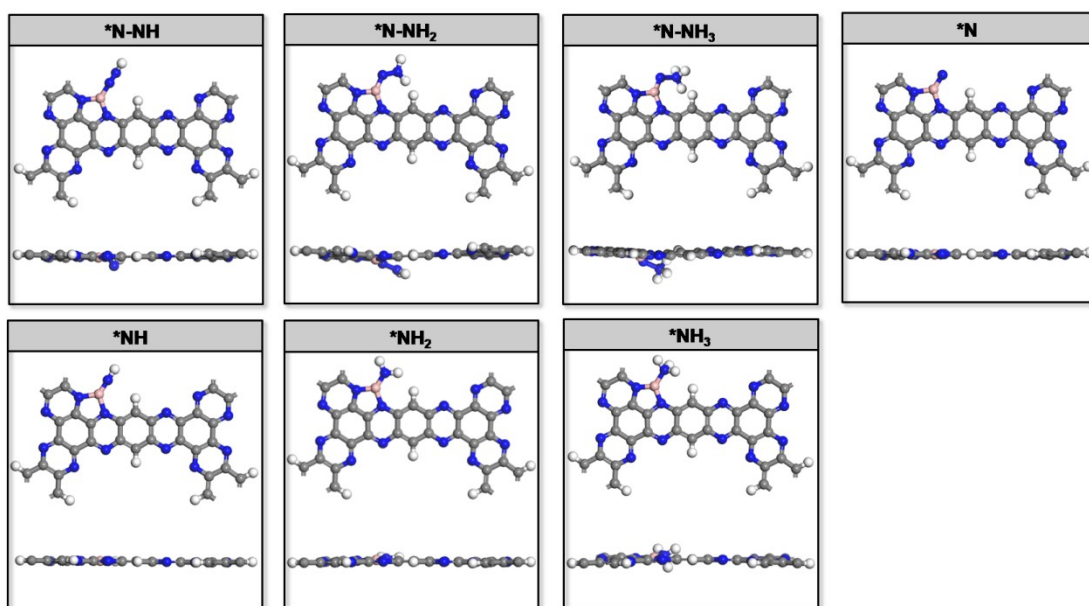

**Fig. S5** Optimized structures of various reduction intermediates on B<sub>int</sub>-doped C<sub>5</sub>N<sub>2</sub> through the distal pathway.



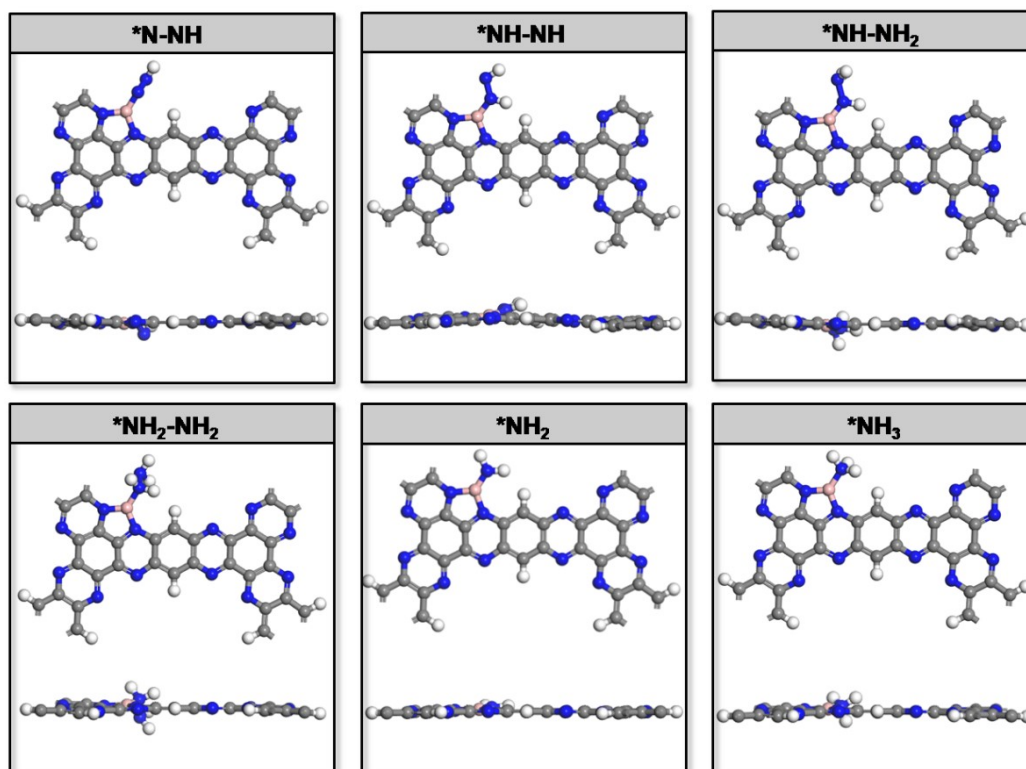

**Fig. S6** Optimized structures of various reduction intermediates on B<sub>int</sub>-doped C<sub>5</sub>N<sub>2</sub> through the alternating pathway.

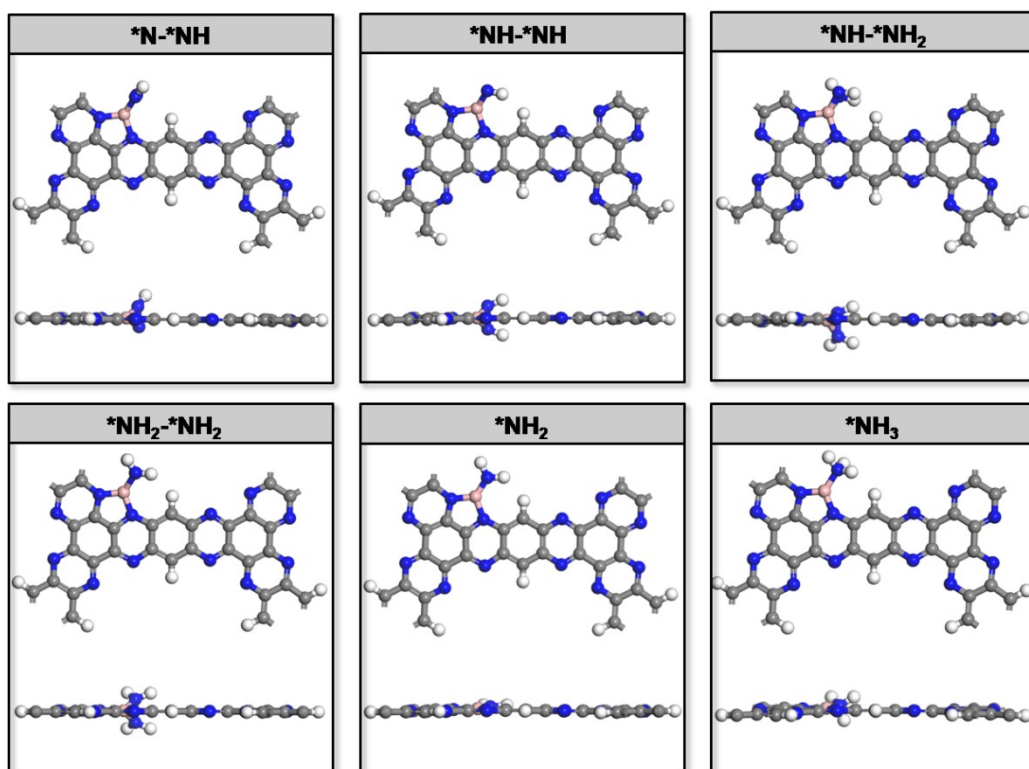

**Fig. S7** Optimized structures of various reduction intermediates on B<sub>int</sub>-doped C<sub>5</sub>N<sub>2</sub> through the enzymatic pathway.

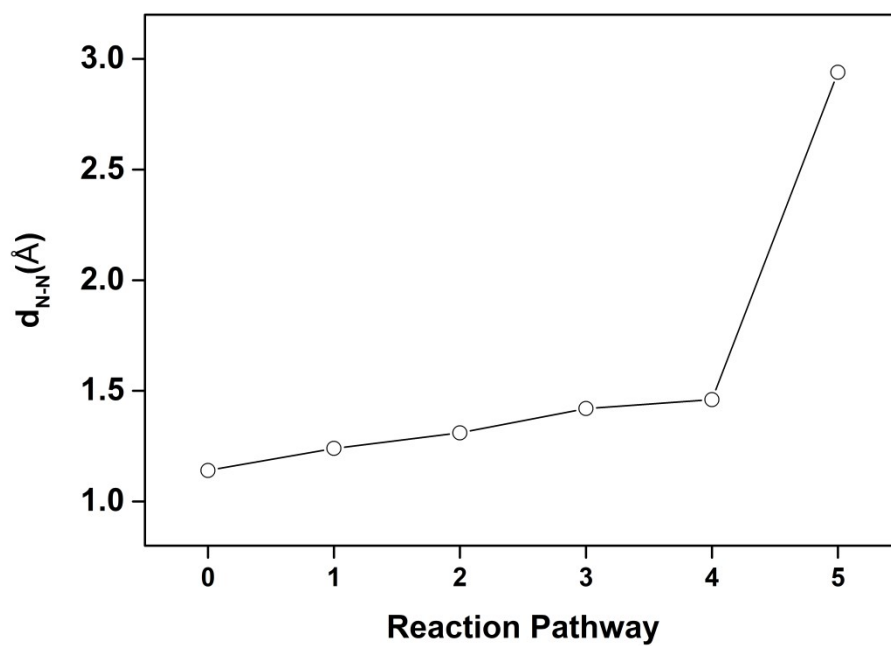

**Fig. S8** The variation of the N–N bond length ( $d_{N-N}$ ) along the alternating pathway *via* end-on pathway on  $B_{\text{int}}$ -doped  $C_5N_2$ . 0, 1, 2, 3, 4, and 5 represent the  $*N_2$ ,  $*N_2H$ ,  $*NH-NH$ ,  $*NH-NH_2$ ,  $*NH_2-NH_2$ , and  $(*NH_2 + NH_3)$ .

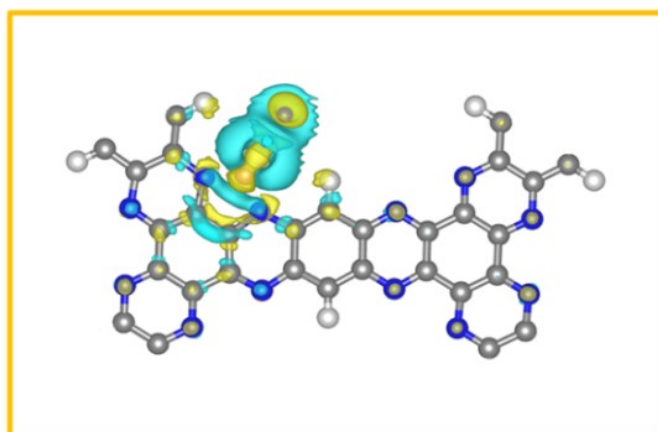

**Fig. S9** The charge difference density of N<sub>2</sub> end-on adsorbed on the B<sub>int</sub>-doped C<sub>5</sub>N<sub>2</sub>.

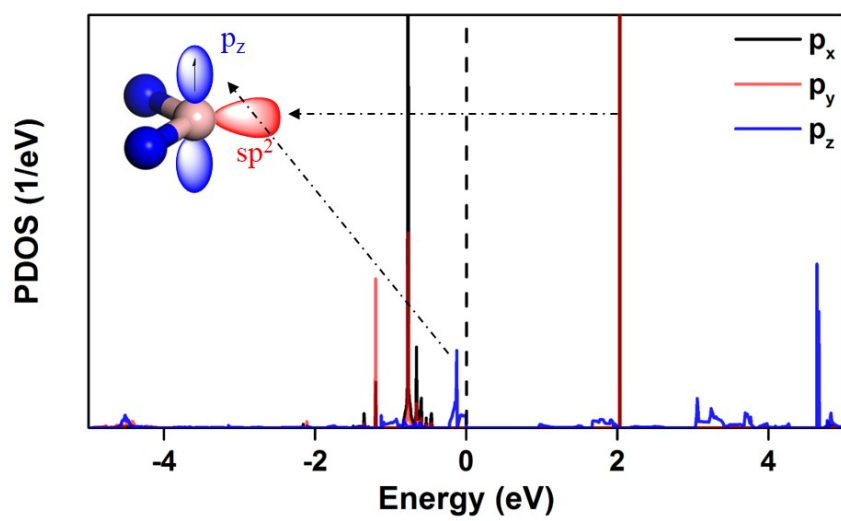

**Fig. S10** The PDOS of B atoms in B<sub>int</sub>-doped C<sub>5</sub>N<sub>2</sub>. The Fermi level is set to zero as shown by the black dotted line.

**Table S3** The free energy changes of  $*N_2 \rightarrow *N_2H$ ,  $*NHNH_2 \rightarrow *NH_2NH_2$ ,  $*NH_2 \rightarrow$

$*NH_3$  on  $B_{int}$ -doped  $C_5N_2$  after adding a water molecule.

| Reaction                        | $\Delta G$ |
|---------------------------------|------------|
| $*N_2 \rightarrow *N_2H$        | 0.22       |
| $*NHNH_2 \rightarrow *NH_2NH_2$ | 0.13       |
| $*NH_2 \rightarrow *NH_3$       | 0.31       |

**Table S4** Computed free energy changes of  $*N_2 \rightarrow *N_2H$ ,  $*NHNH_2 \rightarrow *NH_2NH_2$ ,  $*NH_2 \rightarrow *NH_3$  on B, B<sub>2</sub>, B<sub>3</sub>, and B<sub>4</sub>-doped C<sub>5</sub>N<sub>2</sub>.

| Reaction                        | B    | B <sub>2</sub> | B <sub>3</sub> | B <sub>4</sub> |
|---------------------------------|------|----------------|----------------|----------------|
| $*N_2 \rightarrow *N_2H$        | 0.40 | -0.08          | 0.19           | 0.18           |
| $*NHNH_2 \rightarrow *NH_2NH_2$ | 0.54 | 0.32           | 0.68           | 0.91           |
| $*NH_2 \rightarrow *NH_3$       | 0.52 | 0.57           | 0.86           | 0.99           |
